# Supplementary material for: Mechanical versus manual cardiopulmonary resuscitation (CPR): an umbrella review of contemporary systematic reviews and more
Source: PubMed Central journal article supplement (PMC11290300; doi:10.1186/s13054-024-05037-4), 2024-07-30

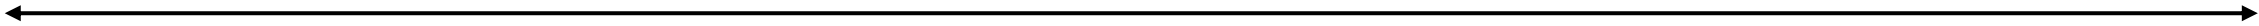

Umbrella review

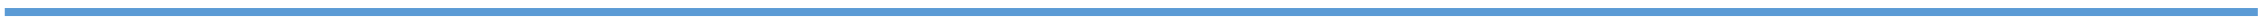

2014 Jan 15

2021 March

2024 Feb 15

New Systematic Review

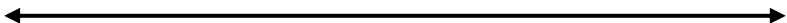

Supplement: 13054_2024_5037_MOESM2_ESM.pdf [file 13054_2024_5037_MOESM2_ESM.pdf]
